# Supplementary material for: Detection of Insect-Specific Flaviviruses in Mosquitoes (Diptera: Culicidae) in Northeastern Regions of South Africa
Source: MDPI journal article supplement (doi:10.3390/v13112148), 2021-10-25
Supplement: s1 [file s1]

## Supplementary Material S1

**Table S1:** Table with PCR assay, corresponding primers, sequences data, and genome position.

| Primer Name                             | Sequence (5' – 3')       | Target gene | Genome position | Ref.     |
|-----------------------------------------|--------------------------|-------------|-----------------|----------|
| <b>Flavivirus First round RT-PCR</b>    |                          |             |                 |          |
| FU1                                     | TACAACATGGGAAAGAGAGAGAA  | NS5         | 9043-9300       | (20, 19) |
| 9317                                    | BBGTGATKCKHGTGTCC        | NS5         |                 |          |
|                                         | TCGTGATGCGTGTGTCC        |             |                 |          |
| <b>Flavivirus Nested, real time PCR</b> |                          |             |                 |          |
| FS778                                   | AARGGHAGYMCDGCHATHHTGGT  | NS5         | 9091-9280       | (19)     |
| CFD2                                    | GTGTCCCAGCCGGCGGTGTCATCA | NS5         |                 |          |
|                                         | GC                       |             |                 |          |
| <b>Flavivirus Heminested PCR</b>        |                          |             |                 |          |
| MAMD                                    | AACATGATGGGRAARAGRGARAA  | NS5         | 9043            | (19)     |
| Flavi-1                                 | AATGTACGCTGATGACACAGCTG  | NS5         |                 | (1)      |
|                                         | GCTGGGACAC               |             |                 |          |
| Flavi-2                                 | TCCAGACCTTCAGCATGTCTTCTG | NS5         |                 | (1)      |
|                                         | TTGTCATCCA               |             |                 |          |

**Table S2:** P-distance matrix showing the percentage (%) nucleotide similarities between mosquito *Flavivirus* detected in mosquito homogenate pools in the small fragment of the NS5. The highlighted sequences are the sequences produced in this study.

|                                             | 1    | 2    | 3    | 4    | 5    | 6    | 7    | 8    | 9    | 10   | 11   | 12   |
|---------------------------------------------|------|------|------|------|------|------|------|------|------|------|------|------|
| 1 Kamiti River virus (NC 005064.1)          |      |      |      |      |      |      |      |      |      |      |      |      |
| 2 Nakiwogo virus (GQ165809.2)               | 67.9 |      |      |      |      |      |      |      |      |      |      |      |
| 3 Lammi virus (FJ606789.2)                  | 53.6 | 44.6 |      |      |      |      |      |      |      |      |      |      |
| 4 Palm Creek virus (NC033694.1)             | 62.5 | 69.6 | 41.8 |      |      |      |      |      |      |      |      |      |
| 5 Nhumirim virus (KJ210048.1)               | 50.3 | 47.3 | 46.1 | 47.3 |      |      |      |      |      |      |      |      |
| 6 Calbertado virus (KX669687.1)             | 71.3 | 62.1 | 59.6 | 66.2 | 45.7 |      |      |      |      |      |      |      |
| 7 Chaoyang virus (NC 017086.1)              | 45.1 | 50.2 | 71.0 | 48.4 | 48.8 | 49.4 |      |      |      |      |      |      |
| 8 Barkedji virus (KC496020.1)               | 37.0 | 32.9 | 46.4 | 35.1 | 74.3 | 39.4 | 44.4 |      |      |      |      |      |
| 9 Quang Binh virus (FJ644291.1)             | 71.9 | 67.3 | 54.5 | 70.8 | 50.1 | 77.4 | 50.8 | 35.5 |      |      |      |      |
| 10 Culex flavivirus (JX897904.1)            | 65.7 | 75.1 | 47.5 | 70.3 | 35.2 | 70.5 | 58.5 | 20.7 | 73.4 |      |      |      |
| 11 Culex flavivirus (AB262759.2)            | 60.9 | 74.1 | 44.9 | 70.0 | 32.9 | 71.6 | 51.2 | 13.1 | 69.3 | 93.0 |      |      |
| 12 Aedes flavivirus (KC181923)              | 70.1 | 63.3 | 37.7 | 64.1 | 36.4 | 66.6 | 43.0 | 23.6 | 67.3 | 59.8 | 63.1 |      |
| 13 Aedes flavivirus (MK241496.1)            | 69.8 | 71.0 | 50.6 | 71.0 | 43.9 | 61.7 | 49.8 | 38.8 | 65.7 | 68.1 | 63.7 | 68.3 |
| 14 Aedes flavivirus Narita-21 (NC 012932.1) | 72.3 | 66.8 | 36.6 | 64.1 | 38.3 | 67.7 | 41.2 | 25.8 | 69.6 | 59.5 | 62.8 | 97.7 |
| 15 Anopheles flavivirus (KX148546.1)        | 60.8 | 70.6 | 46.3 | 72.2 | 44.2 | 65.8 | 52.3 | 33.2 | 67.0 | 69.1 | 70.1 | 59.2 |

|    |                                                |      |      |      |      |      |       |      |      |      |       |       |      |
|----|------------------------------------------------|------|------|------|------|------|-------|------|------|------|-------|-------|------|
| 16 | Mosquito flavivirus<br>(KY995162.1)            | 62.3 | 74.4 | 57.2 | 73.3 | 41.5 | 69.0  | 52.5 | 32.1 | 74.5 | 76.6  | 75.5  | 61.7 |
| 17 | Mosquito flavivirus<br>(HQ676625.1)            | 71.0 | 66.9 | 50.4 | 70.0 | 38.3 | 65.0  | 49.1 | 33.3 | 68.0 | 71.7  | 68.1  | 72.1 |
| 18 | Mosquito flavivirus<br>(HQ676624.1)            | 71.0 | 66.9 | 50.4 | 70.0 | 38.3 | 65.0  | 49.1 | 33.3 | 68.0 | 71.7  | 68.1  | 72.1 |
| 19 | Culiseta flavivirus<br>(KT599442.1)            | 71.7 | 68.3 | 53.1 | 71.7 | 37.8 | 73.1  | 48.5 | 28.3 | 74.1 | 74.9  | 69.6  | 70.3 |
| 20 | KNP17MP30<br>An. coustani                      | 60.8 | 65.5 | 45.2 | 67.2 | 34.3 | 70.7  | 47.6 | 26.6 | 67.3 | 77.2  | 76.2  | 61.0 |
| 21 | KNP17MP29<br>An. coustani                      | 54.1 | 61.5 | 36.5 | 58.4 | 24.7 | 62.3  | 46.2 | 16.5 | 59.9 | 73.8  | 72.8  | 54.1 |
| 22 | KNP17MP667<br>An. squamosus                    | 59.6 | 62.0 | 42.6 | 76.5 | 28.5 | 66.9  | 42.0 | 29.2 | 69.0 | 65.9  | 60.9  | 60.0 |
| 23 | KNP17MP71<br>An. squamosus                     | 45.2 | 52.1 | 33.6 | 43.8 | 15.6 | 49.3  | 39.3 | 6.3  | 52.5 | 68.0  | 73.6  | 51.3 |
| 24 | KNP17MP666<br>An. squamosus                    | 57.4 | 64.1 | 41.7 | 73.6 | 30.0 | 64.8  | 37.6 | 29.7 | 69.0 | 65.9  | 60.9  | 60.2 |
| 25 | KNP17MP673<br>An. maculipalpis                 | 61.6 | 67.0 | 51.6 | 71.4 | 43.0 | 64.7  | 57.7 | 32.1 | 70.3 | 69.1  | 64.8  | 63.2 |
| 26 | COET17MP500<br>Ae. aegypti                     | 66.2 | 63.1 | 43.6 | 66.4 | 30.8 | 61.1  | 42.4 | 25.2 | 64.3 | 68.1  | 64.2  | 67.4 |
| 27 | COET17MP502<br>Ae. aegypti                     | 71.0 | 66.9 | 50.4 | 70.0 | 38.3 | 65.0  | 49.1 | 33.3 | 68.0 | 71.7  | 68.1  | 72.1 |
| 28 | KZN17MP145<br>Ae. aegypti                      | 70.0 | 72.0 | 47.7 | 70.0 | 43.9 | 60.6  | 47.0 | 38.8 | 65.8 | 70.3  | 66.0  | 68.3 |
| 29 | ROOD18MP126<br>Ae. sudanensis                  | 64.1 | 65.9 | 48.6 | 62.5 | 39.6 | 56.5  | 44.5 | 37.7 | 59.7 | 62.6  | 57.9  | 60.2 |
| 30 | KNP17MP653<br>Ae. vexans gr                    | 57.4 | 64.1 | 41.7 | 73.6 | 30.0 | 64.8  | 37.6 | 29.7 | 69.0 | 65.9  | 60.9  | 60.2 |
| 31 | SHI17MP544<br>Aedes spp.                       | 69.8 | 71.0 | 50.6 | 71.0 | 43.9 | 61.7  | 49.8 | 38.8 | 65.7 | 68.1  | 63.7  | 68.3 |
| 32 | KNP17MP639<br>Aedes spp.                       | 62.9 | 66.8 | 52.9 | 71.5 | 54.0 | 70.2  | 54.4 | 35.0 | 79.4 | 68.5  | 65.8  | 67.8 |
|    |                                                | 8    | 9    | 10   | 11   | 12   | 13    | 14   | 15   | 16   | 17    | 18    | 19   |
| 13 | Aedes flavivirus<br>(MK241496.1)               |      |      |      |      |      |       |      |      |      |       |       |      |
| 14 | Aedes flavivirus<br>Narita-21 (NC<br>012932.1) |      |      |      |      |      | 68.5  |      |      |      |       |       |      |
| 15 | Anopheles flavivirus<br>(KX148546.1)           |      |      |      |      |      | 62.6  | 58.1 |      |      |       |       |      |
| 16 | Mosquito flavivirus<br>(KY995162.1)            |      |      |      |      |      | 68.7  | 62.8 | 73.0 |      |       |       |      |
| 17 | Mosquito flavivirus<br>(HQ676625.1)            |      |      |      |      |      | 91.3  | 72.1 | 62.7 | 68.8 |       |       |      |
| 18 | Mosquito flavivirus<br>(HQ676624.1)            |      |      |      |      |      | 91.3  | 72.1 | 62.7 | 68.8 | 100.0 |       |      |
| 19 | Culiseta flavivirus<br>(KT599442.1)            |      |      |      |      |      | 70.7  | 67.9 | 64.2 | 66.9 | 72.0  | 72.0  |      |
| 20 | KNP17MP30<br>An. coustani                      |      |      |      |      |      | 62.9  | 60.8 | 67.2 | 68.9 | 74.6  | 74.6  | 73.7 |
| 21 | KNP17MP29<br>An. coustani                      |      |      |      |      |      | 52.0  | 53.8 | 59.8 | 61.3 | 65.3  | 65.3  | 66.8 |
| 22 | KNP17MP667<br>An. squamosus                    |      |      |      |      |      | 72.3  | 61.3 | 71.9 | 59.3 | 79.3  | 79.3  | 65.0 |
| 23 | KNP17MP71<br>An. squamosus                     |      |      |      |      |      | 44.8  | 50.9 | 40.3 | 52.0 | 51.8  | 51.8  | 52.2 |
| 24 | KNP17MP666<br>An. squamosus                    |      |      |      |      |      | 71.4  | 61.6 | 68.9 | 59.3 | 78.5  | 78.5  | 61.6 |
| 25 | KNP17MP673<br>An. maculipalpis                 |      |      |      |      |      | 66.0  | 63.3 | 89.6 | 69.7 | 69.5  | 69.5  | 62.0 |
| 26 | COET17MP500<br>Ae. aegypti                     |      |      |      |      |      | 87.8  | 67.3 | 58.6 | 65.1 | 96.9  | 96.9  | 68.5 |
| 27 | COET17MP502<br>Ae. aegypti                     |      |      |      |      |      | 91.3  | 72.1 | 62.7 | 68.8 | 100.0 | 100.0 | 72.0 |
| 28 | KZN17MP145<br>Ae. aegypti                      |      |      |      |      |      | 98.5  | 68.5 | 61.5 | 70.8 | 91.3  | 91.3  | 69.7 |
| 29 | ROOD18MP126<br>Ae. sudanensis                  |      |      |      |      |      | 93.7  | 60.5 | 53.0 | 61.7 | 84.9  | 84.9  | 64.9 |
| 30 | KNP17MP653<br>Ae. vexans gr                    |      |      |      |      |      | 71.4  | 61.6 | 68.9 | 59.3 | 78.5  | 78.5  | 61.6 |
| 31 | SHI17MP544<br>Aedes spp.                       |      |      |      |      |      | 100.0 | 68.5 | 62.6 | 68.7 | 91.3  | 91.3  | 70.7 |
| 32 | KNP17MP639                                     |      |      |      |      |      | 72.4  | 68.9 | 67.9 | 70.2 | 69.3  | 69.3  | 72.2 |

**Table S3:** P-distance matrix showing the percentage (%) nucleotide similarities between Cell fusing agent virus detected in mosquito homogenate pools. The highlighted sequences are the sequences produced in this study.

|                             | 1      | 2      | 3      | 4      | 5      | 6      | 7      |
|-----------------------------|--------|--------|--------|--------|--------|--------|--------|
| 1 KJ741267.1 CFAV Galveston |        |        |        |        |        |        |        |
| 2 LR694075.1 CFAV Cairns    | 97.03% |        |        |        |        |        |        |
| 3 HM579916.1 CFAV Colima    | 96.21% | 95.99% |        |        |        |        |        |
| 4 KP792624.1 CFAV Kenya     | 95.81% | 96.01% | 94.55% |        |        |        |        |
| 5 COET17MP503 Ae. aegypti   | 94.58% | 95.58% | 93.70% | 95.61% |        |        |        |
| 6 COET17MP501 Ae. aegypti   | 93.55% | 94.55% | 93.08% | 95.40% | 97.22% |        |        |
| 7 GAU16MP01 Ae. caballus    | 93.97% | 94.97% | 93.51% | 95.41% | 97.42% | 98.03% |        |
| 8 SHI17MP525 Ae. aegypti    | 93.54% | 94.55% | 92.65% | 95.00% | 98.02% | 95.79% | 96.61% |

**Table S4:** P-distance matrix showing the percentage (%) nucleotide similarities between mosquito *Flavivirus* detected in mosquito homogenate pools in the large fragment of the NS5. The highlighted sequence is the sequence produced in this study.

|                                            | 1      | 2      | 3      | 4      | 5      |
|--------------------------------------------|--------|--------|--------|--------|--------|
| 1 Aedes flavivirus (KC181923)              |        |        |        |        |        |
| 2 Aedes flavivirus Narita-21 (NC 012932.1) | 98.24% |        |        |        |        |
| 3 Mosquito flavivirus (KM088035.1)         | 40.12% | 40.65% |        |        |        |
| 4 Mosquito flavivirus (KM088039.1)         | 40.08% | 40.62% | 99.73% |        |        |
| 5 Haslams Creek (MF352617.1)               | 38.84% | 39.95% | 72.89% | 73.28% |        |
| 6 KNP17MP71 An. squamosus                  | 37.57% | 38.11% | 96.58% | 96.86% | 73.02% |

**Supplementary Material S2:** Sequences produced in this study and not deposited at NCBI GenBank.

>KNP17MP30 An. coustani

TGGCTGGGAAGTCGATTCTCGAGTACGAAGCACTAGGATTCCTGAATG  
CGGACCATTGGGTAGCTAGAATGAATTTACCTGTGGGGTCGGAGGAGTTGGG  
GTGAACTACTTTGGTAATTATCTCAAGGAGAT

>KNP17MP29 An. coustani

TGGCTAGGAAGTCCGATTCTCGAGTACGAAGTACTAGGATTCCTGAATG  
CGGACCATTGGGTAGCTAGAATGAATTGAACCTGCGGGGTCGGAGGAGTTGGG  
GTGAACTACTTTGGTAATTATCTCAAGGAGAT

>KNP17MP667 An. squamosus

TGGTTAGGAAGTCGATATCTAGAGTATGAGGCTTTAGGTTTCCTCAACC  
AAGACCATTGGGTTTCACGTGACCATCTGCCATGTGGAGTGGGAGGCGTTGGT  
GTGAACTATTTGGTAATTATCTGAAGGAAAT

>KNP17MP71 An. squamosus

TGGCTCGGAAGTCGGTTTTTGGAGTACGAAGCACTTGGGTTTCCTAAACG  
AGGATCACGGTTTAACCAGCAAAAATATTGCCGACAGGGTTGCCAGATCTCGC  
TTGCATTACTTTGGATACTATCTCCAGGAGAT

>KNP17MP666 An. squamosus

TGGTTAGGAAGTCGATATCTAGAGTATGAGGCTTTGGGTTTTCTCAACC  
AAGACCATTGGGTTTCACGTGACCATCTGCCATGCGGAGTGGGAGGCGTTGGT  
GTGAACTATTTTGGTAATTATCTGAAGGAAAT

>KNP17MP673 *An. maculipalpis*

TGGCTAGGGAGTAGATTCTTGGAATATGAAGCCCTAGGATTCTTAAACC  
AAGACCATTGGGTGTCACGTGACCATTTGCCATGTGGGGTTCGGAGGCGTTGGT  
GTCAATTACTTCGGAAATTACCTGAAGGAAAT

>COET17MP500 *Ae. aegypti*

TGGCTGGGAAGTCGATATCTGGAATATGAGCCCTTGGGCTTCCTCACCG  
AAGACCATTGGGTAGCCCGTGAAAATTTCCCGAATGGCGTGGGAGGTCTCGGT  
GTGAACTACTTTGGTAATTATCTCAAGGAGAT

>COET17MP502 *Ae. aegypti*

TGGCTGGGAAGTCGATATCTGGAATATGAGGCCTTGGGCTTCCTCAACG  
AAGACCATTGGGTAGCCCGTGAAAATTTCCCGGGTGGCGTGGGAGGTCTCGGT  
GTGAACTACTTTGGTAATTATCTCAAGGAGAT

>KZN17MP145 *Ae. aegypti*

TGGCTGGGAAGTCGATATCTGGAATATGAGGCCTTGGGCTTCCTCAACG  
AAGACCATTGGGTAGCCCGTGAAAATTTCCCGGGCGGCGTGGGAGGTCTCGGC  
GTGAACTACTTTGGCTATTACTTGTGAGAAAT

>ROOD18MP126 *Ae. sudanensis*

TGGCTGGGAAGTCGATATCTTGGATATGAGGCCTTGGGCTTCCTCAACG  
AAGACCATTGGGTAGCCCGTGAAAATTTCCCGGGCGGCGTGGGAGGTCTCGTA  
CTATACTACTTTGGCTATTACTTGTGATAAAT

>KNP17MP653 *Ae. vexans* gr

TGGTTAGGAAGTCGATATCTAGAGTATGAGGCTTTGGGTTTTCTCAACC  
AAGACCATTGGGTTTCACGTGACCATCTGCCATGCGGAGTGGGAGGCGTTGGT  
GTGAACTATTTTGGTAATTATCTGAAGGAAAT

>SHI17MP544 *Aedes* spp.

TGGCTGGGAAGTCGATATCTGGAATATGAGGCCTTGGGCTTCCTCAACG  
AAGACCATTGGGTAGCCCGTGAAAATTTCCCGGGTGGCGTGGGAGGTCTCGGC  
GTAAACTACTTTGGCTATTACTTGTGAGAAAT

>KNP17MP639 *Aedes* spp.

TGGTTGGGCAGTAGGTTCTTGAGTATGAGGCCCTGGGGTTTTTAAATGAGGAT  
CACTGGGTAGCACGGGAGAATTTCCCTGGTGGTGTCCGAGGCATGGGCGTTAA  
CTACTTTGGCTATTACCTGGAGGAAAT
